# Supplementary material
Source: publisher figshare collection journal article supplement (https://acs.figshare.com/ndownloader/files/5722077)
Supplement: Supplementary file 1 [file 5722077]

# Structural Study of Three Isomers of Tm@C<sub>82</sub> by <sup>13</sup>C-NMR Spectroscopy.

Takeshi Kodama\*, Norio Ozawa, Yoko Miyake, Koichi Sakaguchi, Hiroyuki Nishikawa,  
Isao Ikemoto, Koichi Kikuchi, Yohji Achiba  
Department of Chemistry, Tokyo Metropolitan University, Hachioji, Tokyo 192-0397, Japan

## Supporting Information (experimental details)

### [HPLC chromatograms]

Figure 1a shows the HPLC chromatogram of the first stage (a Buckyprep column 20mm × 250mm; toluene; flow rate 12ml/min). Tm@C<sub>82</sub> was found in the tail of a hollow C<sub>84</sub> fraction indicated in the figure. Figure 1b shows the HPLC chromatogram of the second stage (two Buckyprep column 20mm × 250mm; toluene; flow rate 12ml/min). Tm@C<sub>82</sub>(I) was separated from the other two isomers. Figure 1c shows the HPLC chromatogram of the third stage for Tm@C<sub>82</sub>(I) (two Buckyprep column 20mm × 250mm; toluene; flow rate 12ml/min). Figure 1d shows the HPLC chromatogram of the fourth stage for Tm@C<sub>82</sub>(I) (a 5PBB column 20mm × 250mm; toluene; flow rate 12ml/min). Empty fullerenes were removed and Tm@C<sub>82</sub>(I) was isolated. Figure 1e shows the HPLC chromatogram of the third stage of Tm@C<sub>82</sub>(II) and Tm@C<sub>82</sub>(III) (two Buckyprep column 20mm × 250mm; toluene; flow rate 12ml/min). They were roughly separated from each other and the empty fullerenes were removed. Figure 1f shows the HPLC chromatogram of the fourth stage for Tm@C<sub>82</sub>(II) and Tm@C<sub>82</sub>(III) (a Buckyclutcher column 20mm × 250mm; toluene; flow rate 12ml/min). Tm@C<sub>82</sub>(II) and Tm@C<sub>82</sub>(III) were completely isolated each other.

### [<sup>13</sup>C-NMR spectra of Tm@C<sub>82</sub>(II) in a proton-coupled mode and in a proton-decoupled mode]

Figure S2 shows the <sup>13</sup>C-NMR spectra of Tm@C<sub>82</sub>(II) in CS<sub>2</sub> solution at room temperature; (a) and (b) were measured in a mode and a proton-decoupled mode respectively.

### [Temperature dependent <sup>13</sup>C-NMR spectra of Tm@C<sub>82</sub>(II)]

Figure S3 shows the temperature dependent <sup>13</sup>C-NMR spectra of Tm@C<sub>82</sub>(II) in CS<sub>2</sub> solution; (a), (b), and (c) were measured at 0°C, 22°C, and 35°C respectively.

### [Absorption spectra of three isomers of Tm@C<sub>82</sub>]

Each isomer was identified with those reported by Dunsch et al. by comparing the absorption spectra. Figure S4 shows the absorption spectra of Tm@C<sub>82</sub>(I), Tm@C<sub>82</sub>(II), and Tm@C<sub>82</sub>(III) in CS<sub>2</sub> solution at room temperature.

### [ESR spectra of three isomers of Tm@C<sub>82</sub>]

Figure S5 shows the ESR spectra of Tm@C<sub>82</sub>(I), Tm@C<sub>82</sub>(II), and Tm@C<sub>82</sub>(III) in CS<sub>2</sub> solution at 5K. The peaks marked with a solid square were assigned to paramagnetic impurities. The broad feature marked with an open square in the spectrum of isomer II was due to baseline instability. Detailed analysis is now in progress.

### [Line positions and relative intensities in the <sup>13</sup>C-NMR spectra of three isomers of Tm@C<sub>82</sub>]

Table S1 shows the line positions and relative intensities in the <sup>13</sup>C-NMR spectra of three isomers of Tm@C<sub>82</sub> at room temperature.

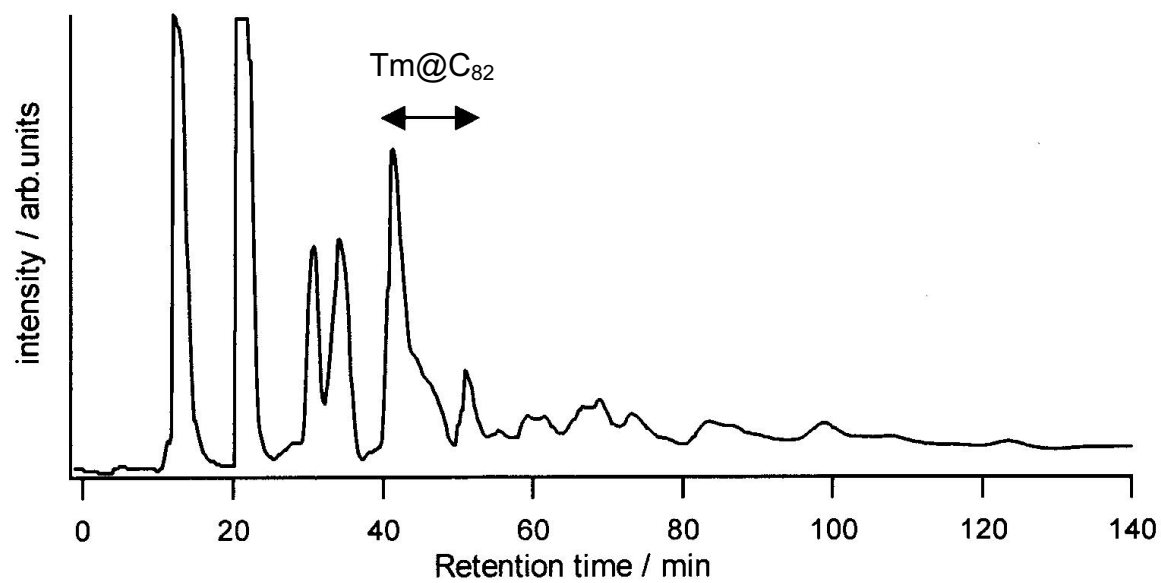

**Figure S1a**

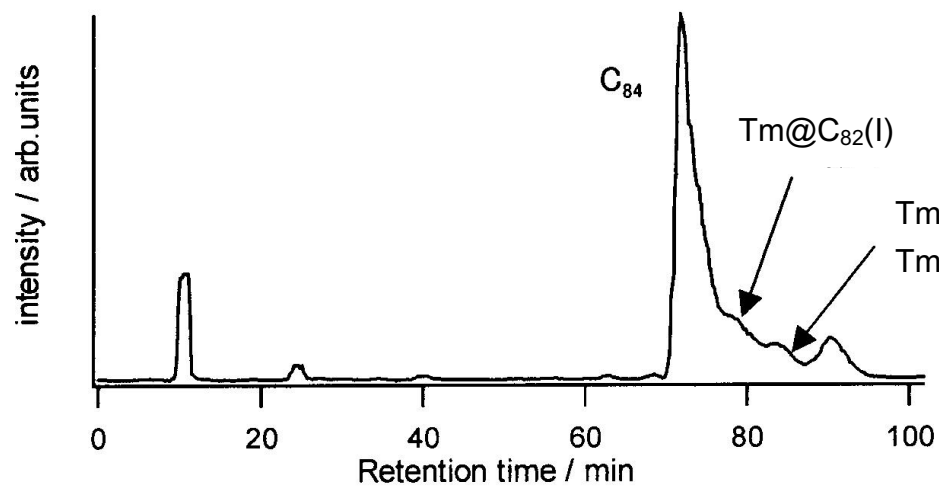

**Figure S1b**

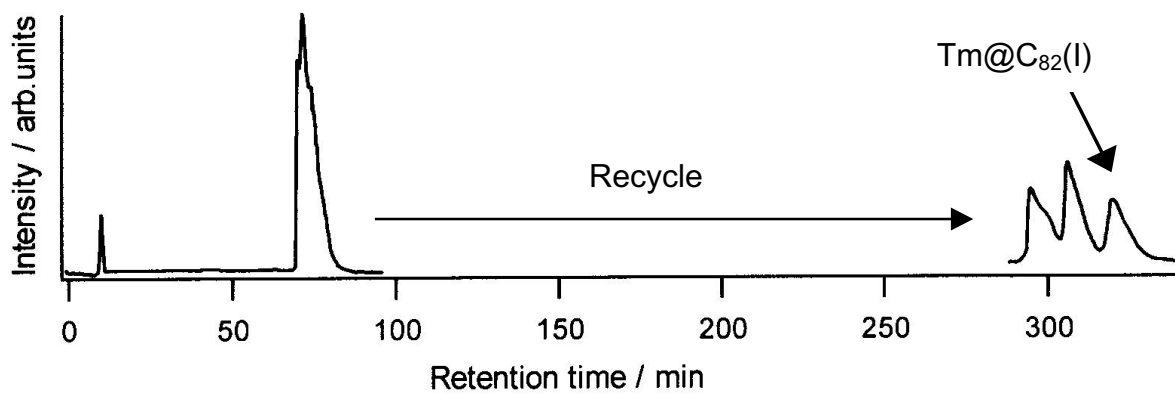

**Figure S1c**

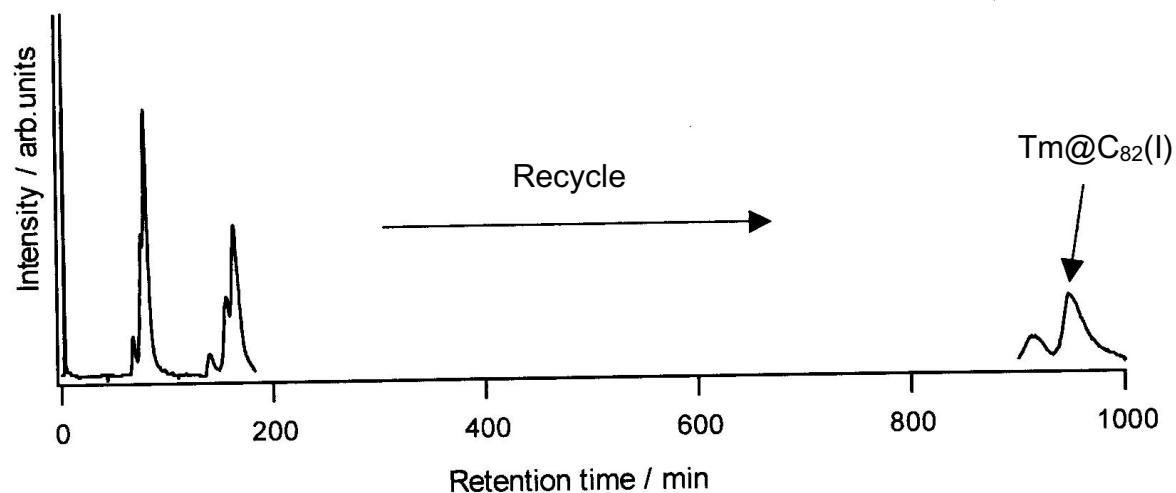

**Figure S1d**

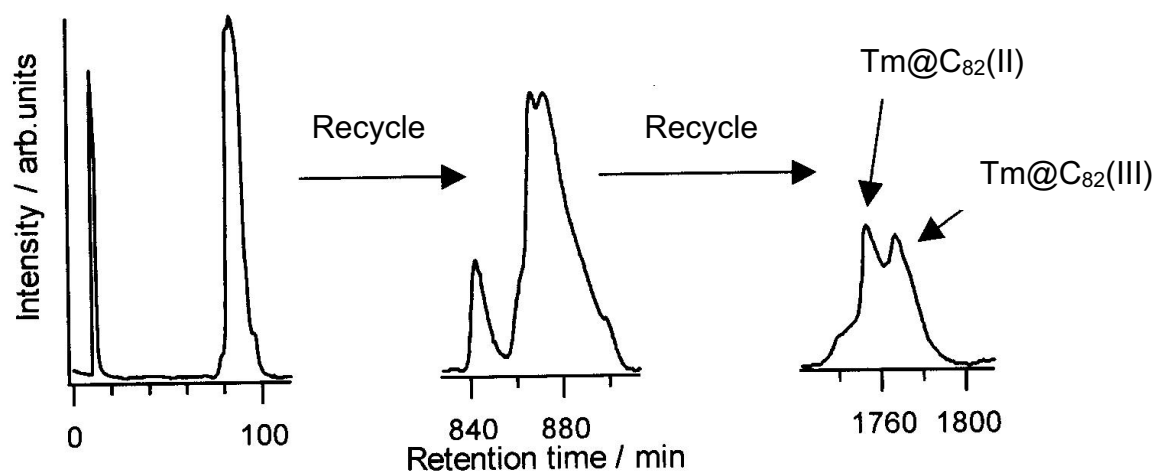

**Figure S1e**

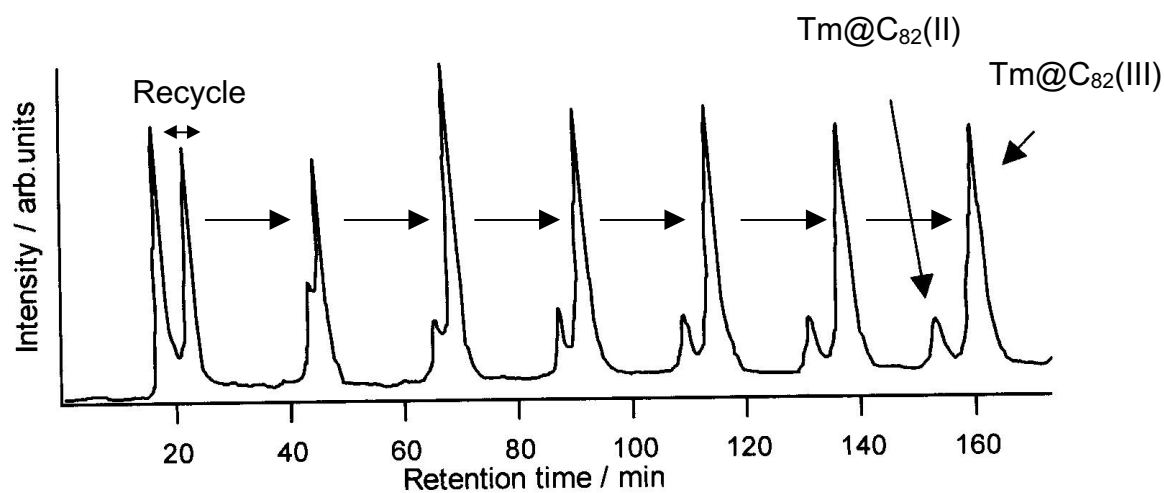

**Figure S1f**

**proton-  
coupled**

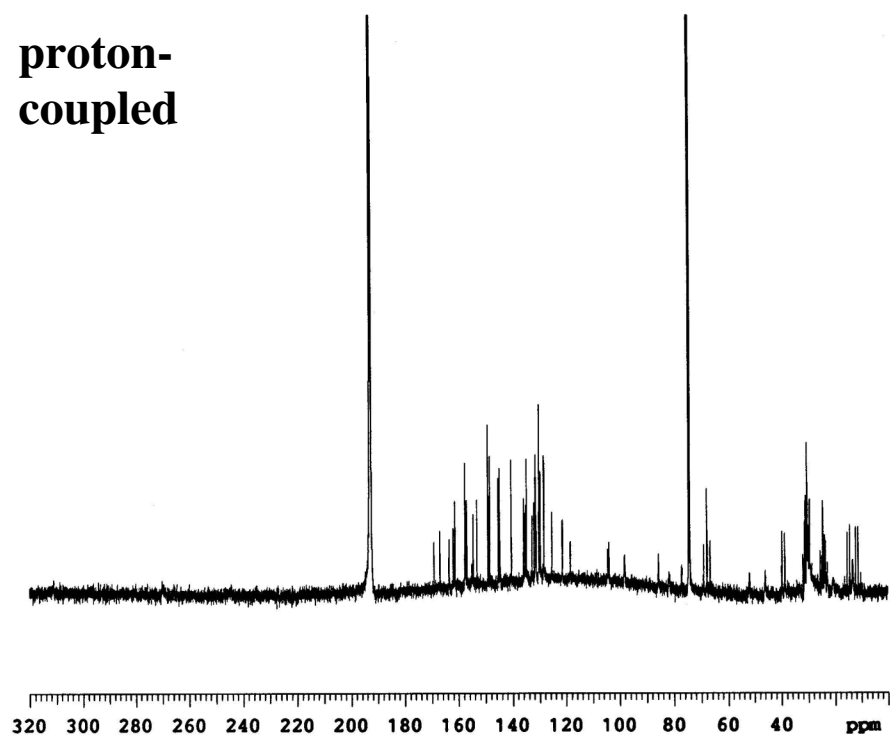

**Figure S2a**

**proton-  
decoupled**

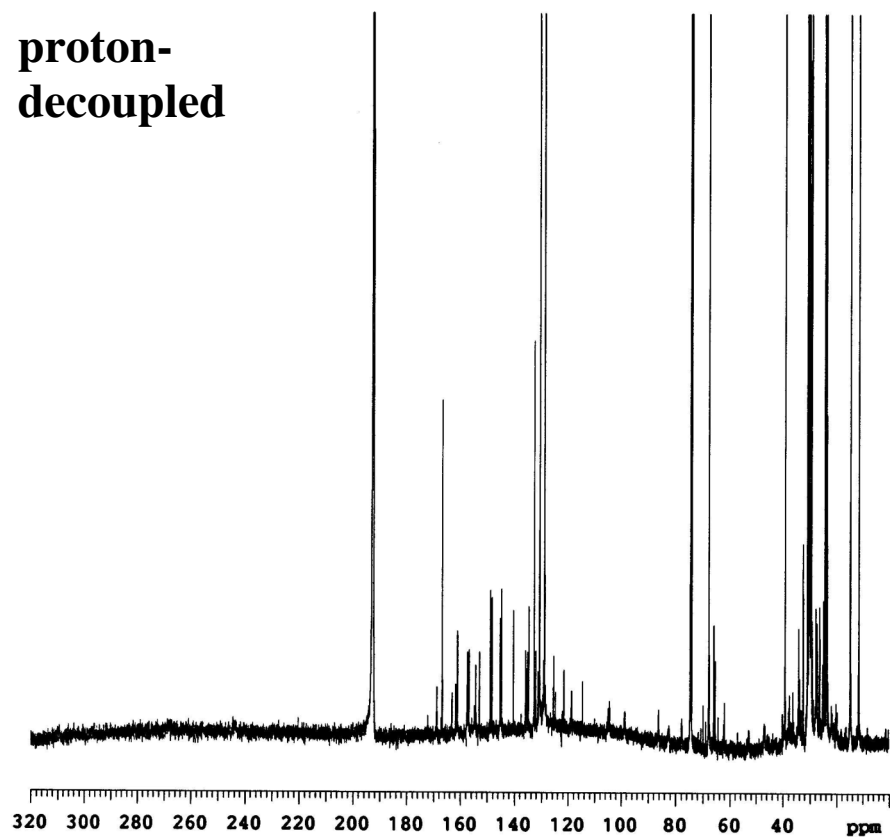

**Figure S2b**

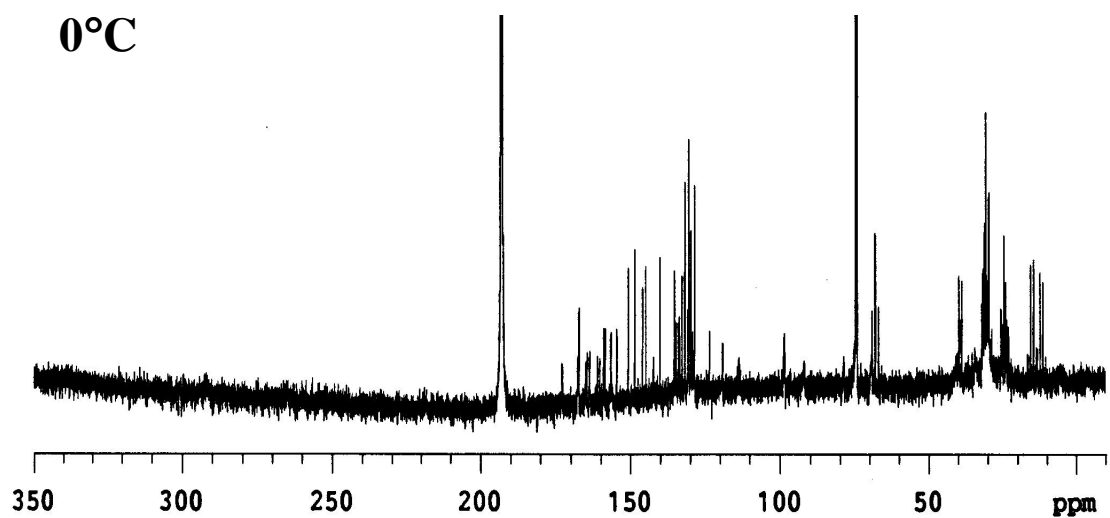

**Figure S3a**

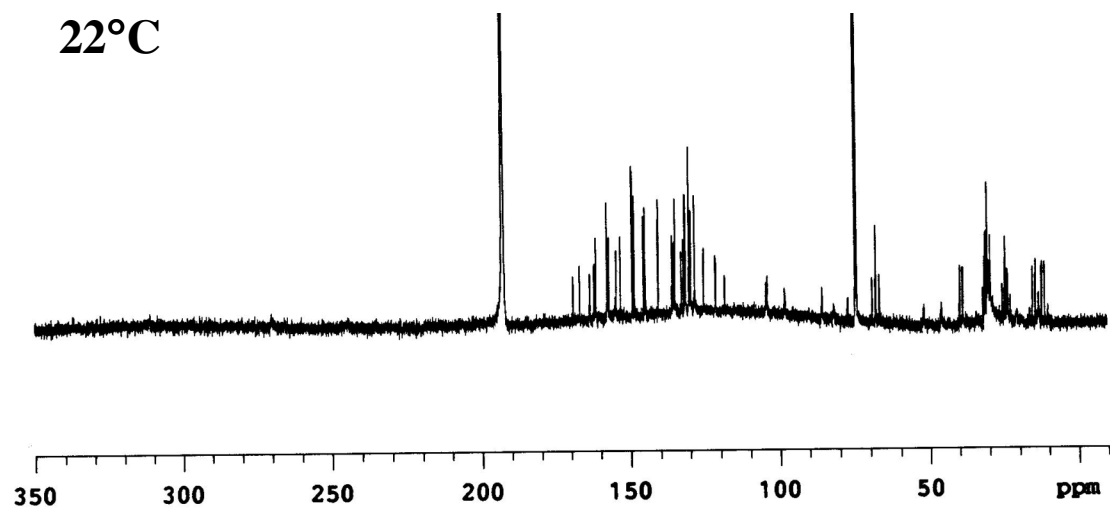

**Figure S3b**

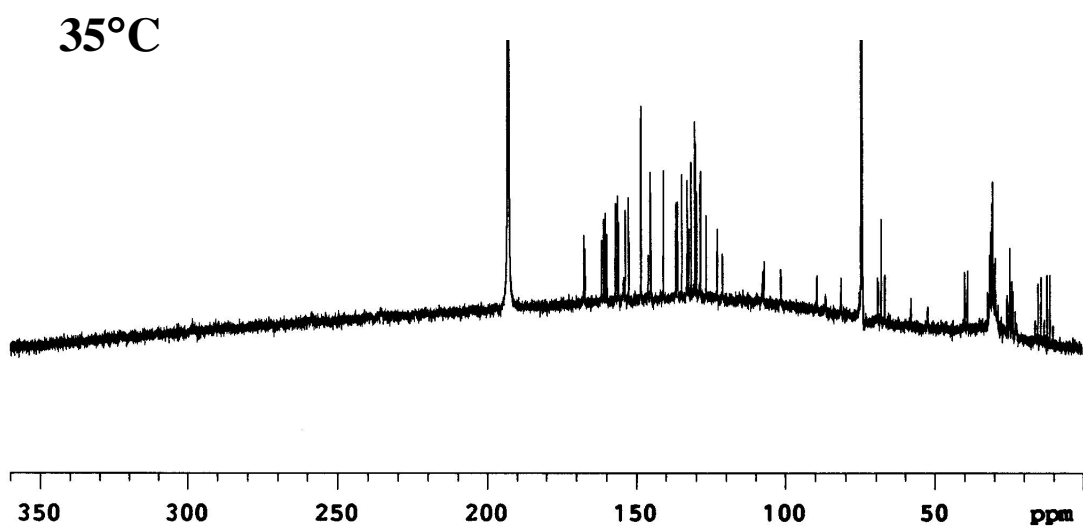

**Figure S3c**

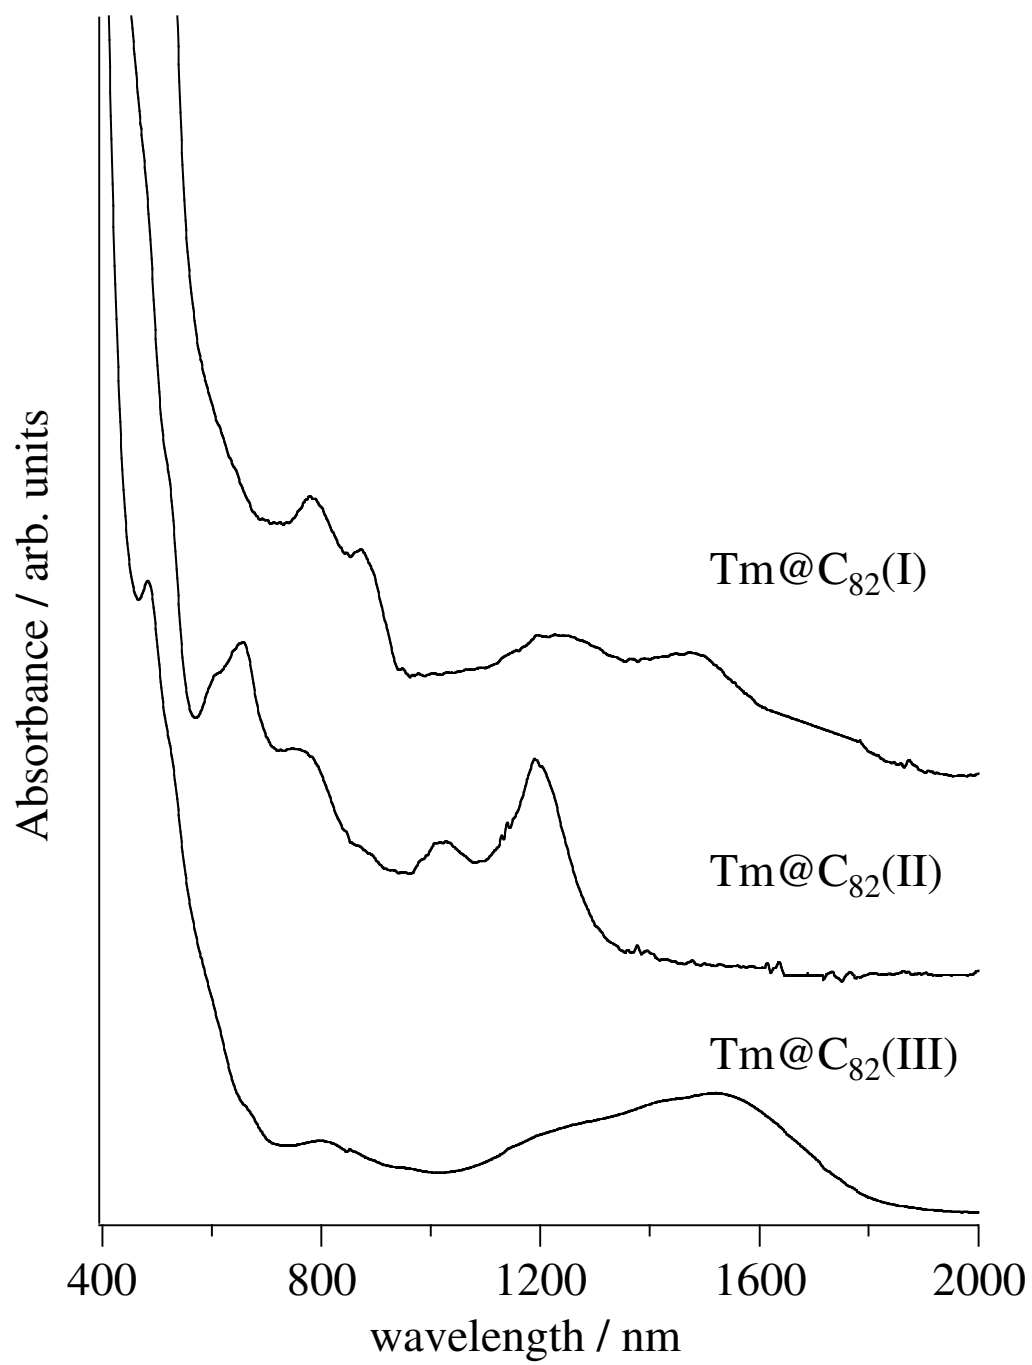

**Figure S4**

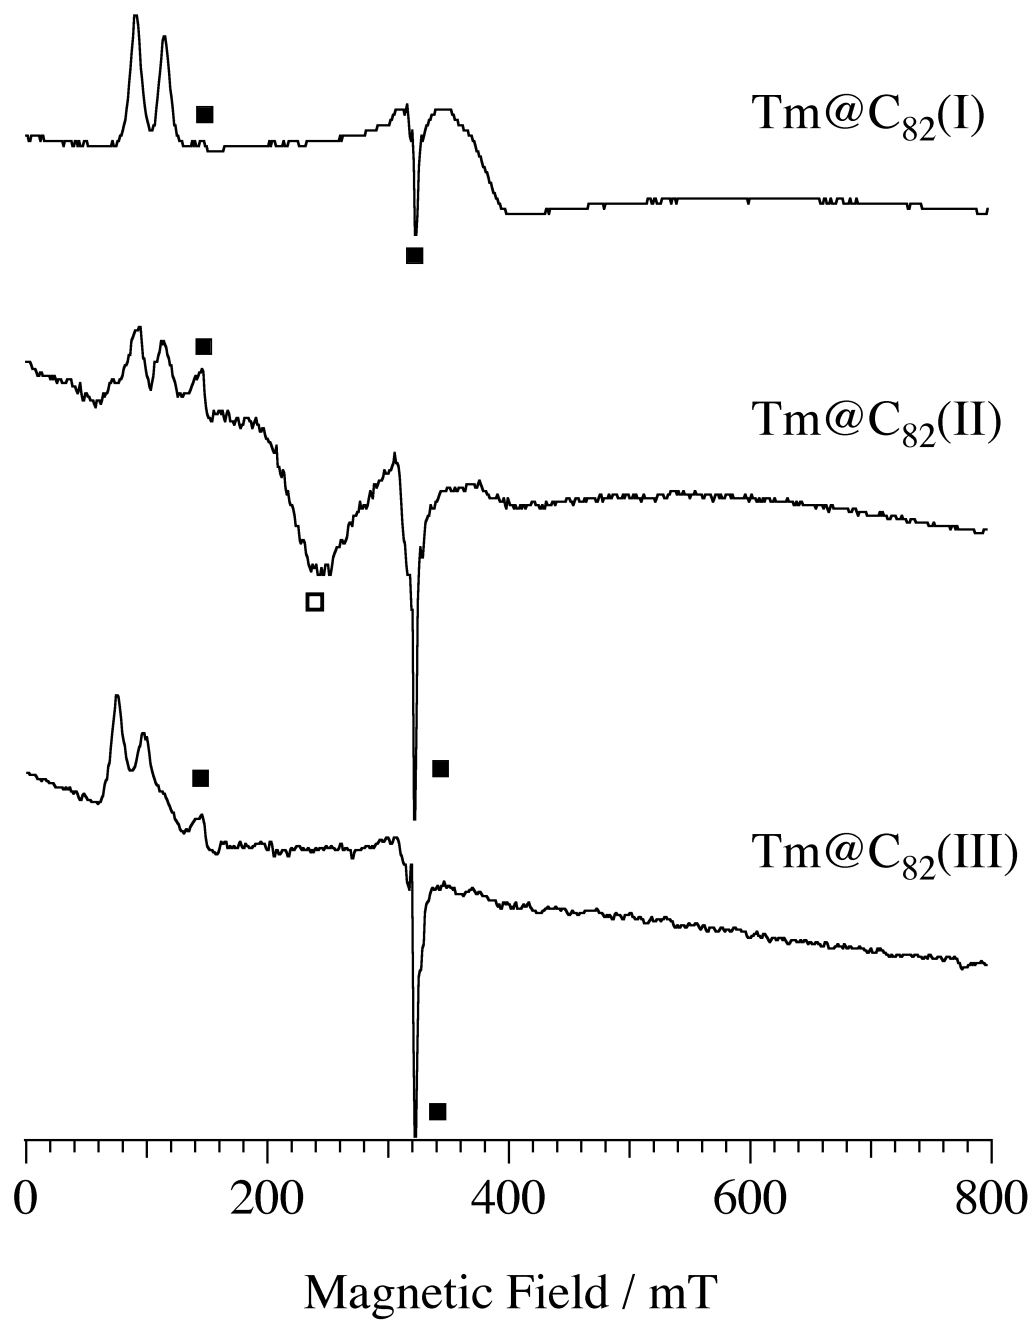

**Figure S5**

Table S1 Line positions and relative intensities in the  $^{13}\text{C}$ -NMR spectra of three isomers of  $\text{Tm@C}_{82}$  at room temperature.

| No. | Isomer I    |                    | Isomer II   |                    | Isomer III  |                    |
|-----|-------------|--------------------|-------------|--------------------|-------------|--------------------|
|     | Shift (ppm) | Relative intensity | Shift (ppm) | Relative intensity | Shift (ppm) | Relative intensity |
| 1   | 48.22       | 2                  | 19.22       | 1                  | 60.25       | 1                  |
| 2   | 60.01       | 2                  | 26.17       | 1                  | 76.78       | 2                  |
| 3   | 61.78       | 2                  | 50.05       | 1                  | 88.10       | 1                  |
| 4   | 77.63       | 2                  | 55.88       | 1                  | 90.83       | 2                  |
| 5   | 85.85       | 2                  | 79.84       | 1                  | 92.99       | 2                  |
| 6   | 87.17       | 2                  | 84.92       | 1                  | 93.50       | 2                  |
| 7   | 90.57       | 2                  | 88.08       | 1                  | 108.01      | 2                  |
| 8   | 102.25      | 2                  | 100.24      | 1                  | 119.37      | 2                  |
| 9   | 103.08      | 1                  | 106.00      | 1                  | 119.78      | 2                  |
| 10  | 108.83      | 2                  | 106.44      | 1                  | 124.86      | 1                  |
| 11  | 111.95      | 2                  | 120.15      | 1                  | 127.26      | 2                  |
| 12  | 111.84      | 1                  | 122.39      | 1                  | 129.87      | 2                  |
| 13  | 114.25      | 2                  | 126.15      | 1                  | 137.96      | 2                  |
| 14  | 114.89      | 2                  | 131.94      | 1                  | 139.68      | 2                  |
| 15  | 117.02      | 2                  | 132.58      | 1                  | 142.15      | 2                  |
| 16  | 122.27      | 2                  | 134.75      | 1                  | 142.03      | 2                  |
| 17  | 122.54      | 2                  | 135.68      | 1                  | 151.70      | 1                  |
| 18  | 127.40      | 2                  | 135.95      | 1                  | 153.67      | 1                  |
| 19  | 127.62      | 2                  | 136.44      | 1                  | 153.80      | 2                  |
| 20  | 128.82      | 2                  | 140.70      | 1                  | 157.36      | 2                  |
| 21  | 131.53      | 2                  | 145.53      | 1                  | 168.50      | 2                  |
| 22  | 136.91      | 2                  | 144.93      | 1                  | 168.75      | 1                  |
| 23  | 138.88      | 2                  | 145.23      | 1                  | 242.22      | 2                  |
| 24  | 139.29      | 2                  | 148.43      | 1                  | 283.58      | 1                  |
| 25  | 140.29      | 2                  | 148.63      | 1                  |             |                    |
| 26  | 142.00      | 2                  | 148.63      | 1                  |             |                    |
| 27  | 147.43      | 2                  | 152.73      | 1                  |             |                    |
| 28  | 148.27      | 1                  | 153.97      | 1                  |             |                    |
| 29  | 148.82      | 2                  | 154.52      | 1                  |             |                    |
| 30  | 149.16      | 2                  | 156.49      | 1                  |             |                    |
| 31  | 150.30      | 2                  | 156.38      | 1                  |             |                    |
| 32  | 150.64      | 2                  | 156.50      | 1                  |             |                    |
| 33  | 151.10      | 1                  | 157.19      | 1                  |             |                    |
| 34  | 153.90      | 2                  | 160.69      | 1                  |             |                    |
| 35  | 154.90      | 2                  | 160.35      | 1                  |             |                    |
| 36  | 156.09      | 2                  | 161.23      | 1                  |             |                    |
| 37  | 160.19      | 2                  | 162.29      | 1                  |             |                    |
| 38  | 162.62      | 2                  | 168.10      | 1                  |             |                    |
| 39  | 162.85      | 2                  | 238.89      | 1                  |             |                    |
| 40  | 163.02      | 2                  | 262.85      | 1                  |             |                    |
| 41  | 166.19      | 2                  | 303.32      | 1                  |             |                    |
| 42  | 258.33      | 2                  |             |                    |             |                    |
| 43  | 299.45      | 1                  |             |                    |             |                    |
| 44  | 414.00      | 1                  |             |                    |             |                    |
